# Supplementary material for: Inflammatory bowel disease (IBD) in horses: a retrospective study exploring the value of different diagnostic approaches
Source: PubMed Central journal article supplement (PMC5775604; doi:10.1186/s12917-018-1343-1), 2018-01-19
Supplement: 12917_2018_1343_MOESM1_ESM.pdf [file 12917_2018_1343_MOESM1_ESM.pdf]

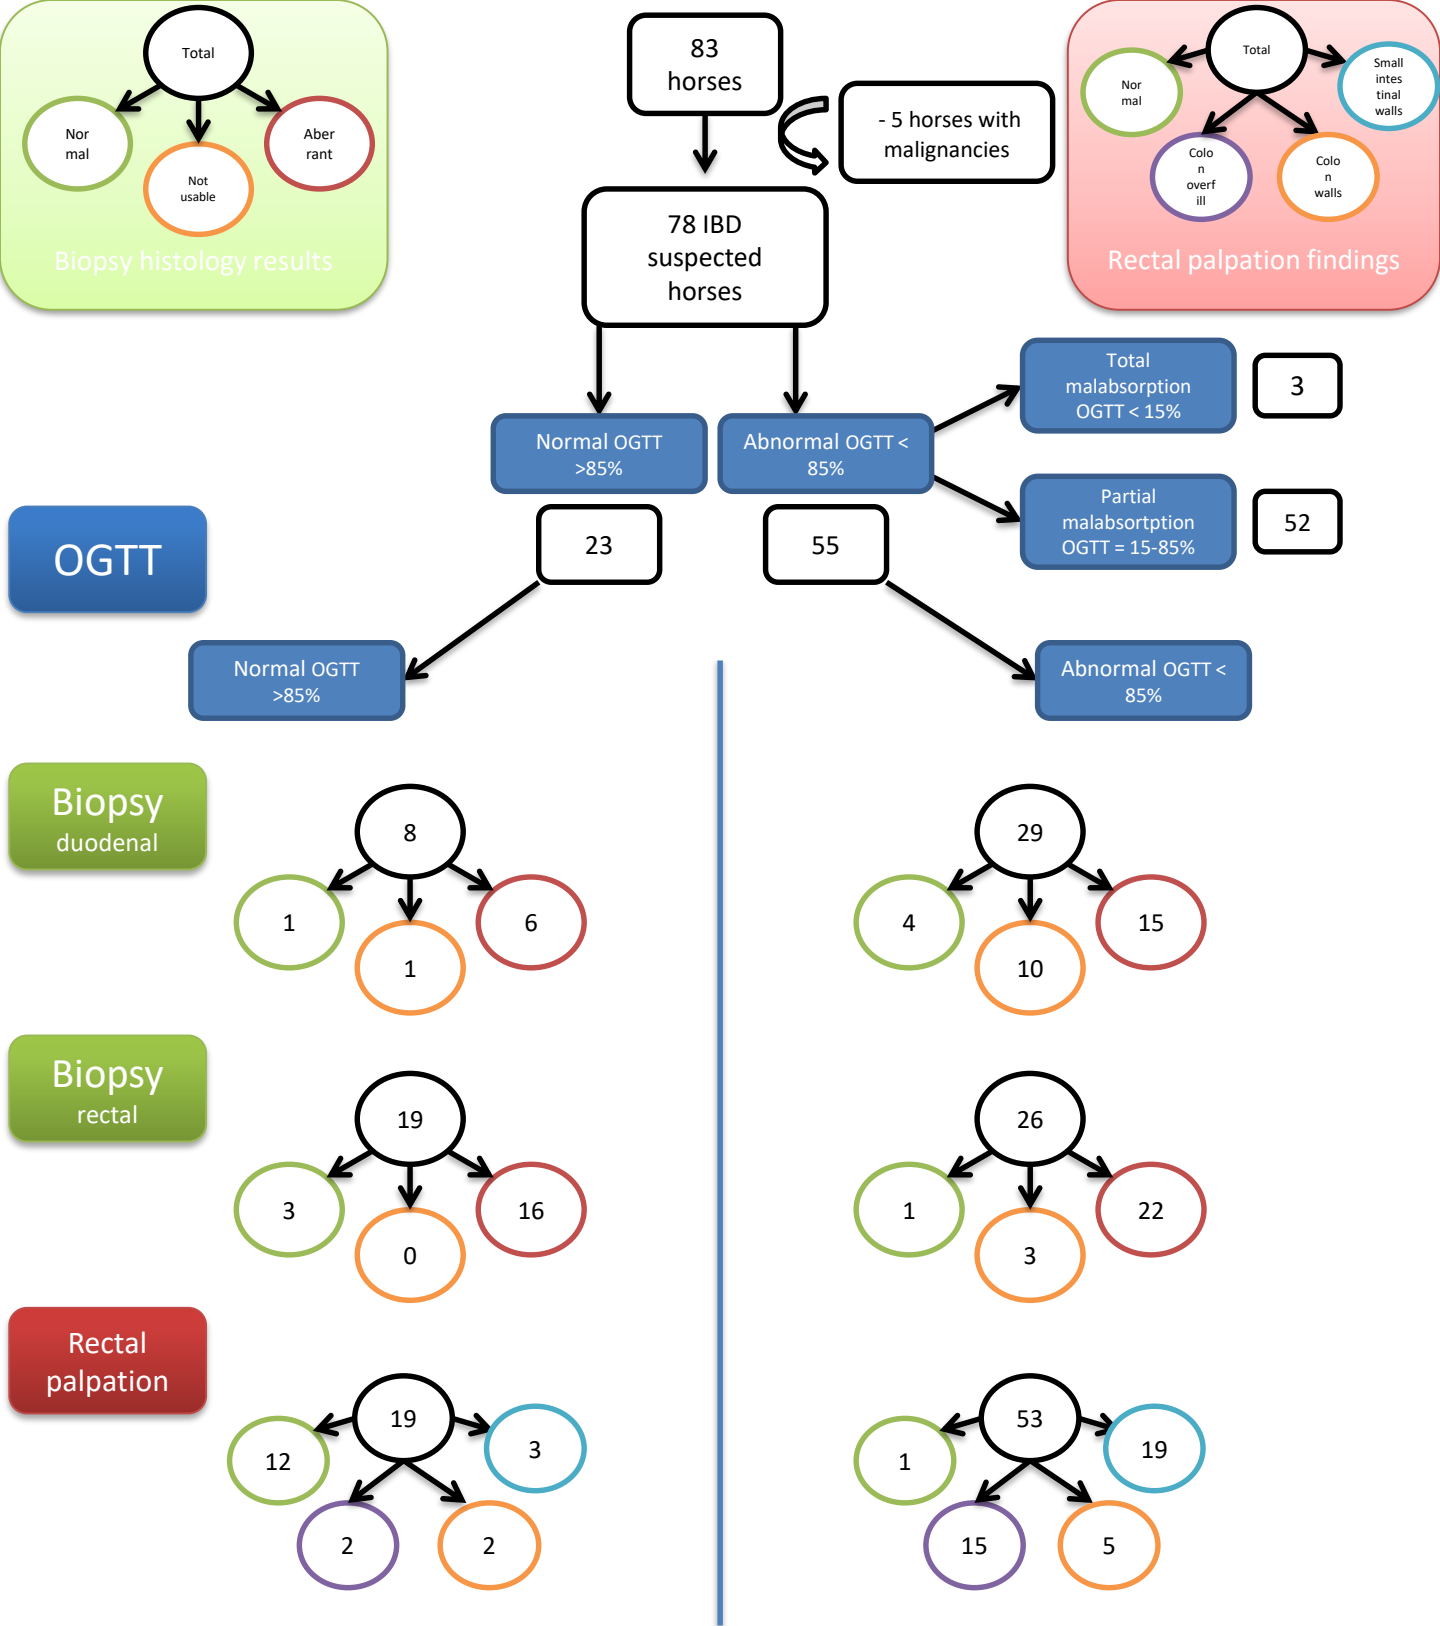

**Additional figure 1:** Overview of the equine IBD suspected study population, classified by OGTT result (either normal: left panel, or abnormal: right panel), depicting enteral biopsy results (either duodenal (top panel) or rectal (middle panel) and rectal palpation results (bottom panel). In the left and right upper corner colour codes are depicted for classification of respectively enteral biopsy (left panel) and rectal palpation (right panel).
