# Supplementary material for: Inflammatory bowel disease (IBD) in horses: a retrospective study exploring the value of different diagnostic approaches
Source: PubMed Central journal article supplement (PMC5775604; doi:10.1186/s12917-018-1343-1), 2018-01-19
Supplement: 12917_2018_1343_MOESM3_ESM.pdf [file 12917_2018_1343_MOESM3_ESM.pdf]

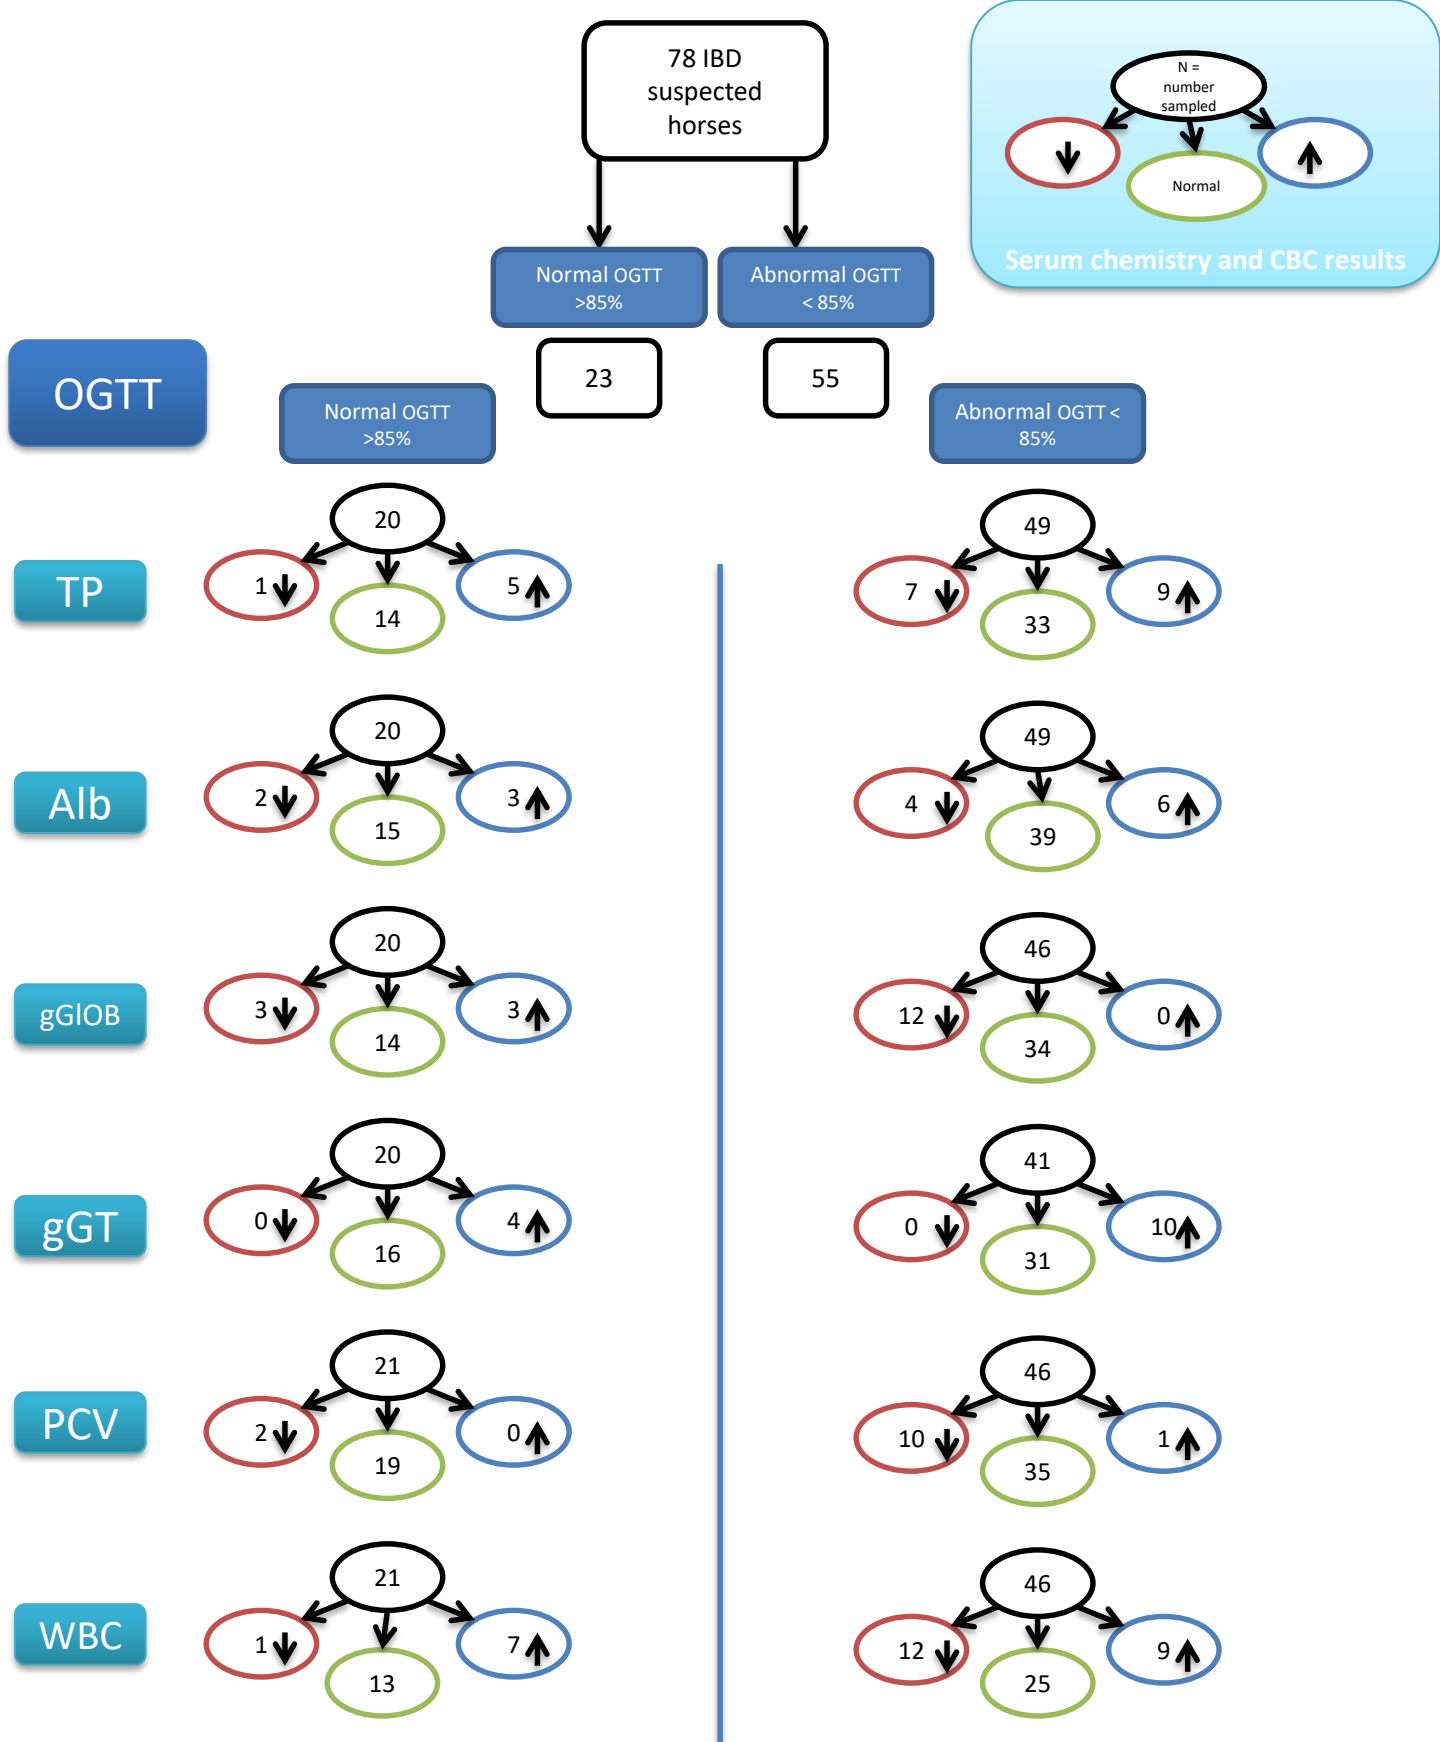

**Additional figure 3:** Overview of serum chemistry and CBC results of the equine IBD suspected study population, classified by OGTT result (either normal: left panel, or abnormal: right panel), depicted as either below reference ↓, within or above ↑ reference range.
